# Supplementary material for: Highly-efficient conversion of glycerol to solketal over heterogeneous Lewis acid catalysts
Source: Royal Society of Chemistry journal article supplement (doi:10.1039/c2gc16619d), 2012-01-01
Supplement: c2gc16619d.pdf [file c2gc16619d.pdf]

Table 1. Comparison between heterogeneous catalysts for the conversion of glycerol to solketal.

| Catalyst                                                                | Catalyst loading<br>(relative to glycerol) | Acetone to<br>glycerol molar<br>ratio | Solvent         | Reaction<br>time | Reaction<br>temperature<br>(°C) | Others                                                                                 | Glycerol<br>conversion<br>(%) | TON  | Ref.         |
|-------------------------------------------------------------------------|--------------------------------------------|---------------------------------------|-----------------|------------------|---------------------------------|----------------------------------------------------------------------------------------|-------------------------------|------|--------------|
| Amberlyst-36                                                            | 5 wt%                                      | 1.5                                   | dichloromethane | 8 h              | 38-40                           | Formed water was removed continuously by Dean-Stark trap                               | 88                            | 33   | [19]         |
| Amberlyst DPT-1                                                         | 5 wt%                                      | 2                                     | -               | 4 h              | 70                              |                                                                                        | 100                           | -    | [20]         |
| Zeolite USY                                                             | 13 wt%                                     | 1.2                                   | -               | 40 min           | 70                              | -                                                                                      | 60                            | 22   | [21]         |
| Zeolite Beta                                                            | 19 wt%                                     | 1.2                                   | -               | 40 min           | 70                              | -                                                                                      | 90                            | 33   | [21]         |
| K10<br>montmorillonite                                                  | 10 wt%                                     | 20                                    | -               | 2 h              | 60                              | Formed water was removed continuously with zeolite NaA                                 | 82                            | 178  | [22]         |
| Arenesulfonic acid-<br>modified<br>mesostructured<br>silica (Ar-SBA-15) | 5 wt%                                      | 6                                     | -               | 30 min           | 70                              | Formed water and the excess of acetone were removed by a two-step batch mode operation | 90                            | 184  | [23]         |
| Tungstophosphoric<br>acid immobilized<br>on silica                      | 5 wt%                                      | 6                                     |                 | 4 h              | 70                              | -                                                                                      | 100                           | 121  | [24]         |
| Hf-TUD-1                                                                | 3 wt%                                      | 1                                     | -               | 6 h              | 80                              | -                                                                                      | 52                            | 1920 | this<br>work |

Turnover number (TON) is moles of glycerol converted per mole of acid sites.
